# Supplementary material
Source: Springer Nature journal article supplement (https://www.springermedizin.de/resource/supplementary/13012_2006_35_MOESM1_ESM.pdf/9629196)
Supplement: MOESM1 [file 9629196]

| Assessment of Previous Metabolic Data                                                                                                                                                                                                          |                          |                                          |                                                                                                                      |
|------------------------------------------------------------------------------------------------------------------------------------------------------------------------------------------------------------------------------------------------|--------------------------|------------------------------------------|----------------------------------------------------------------------------------------------------------------------|
|                                                                                                                                                                                                                                                | Previous                 | Latest                                   | Management Prompt                                                                                                    |
| HbA1c                                                                                                                                                                                                                                          | 07/02/2001<br>7.7        | 25/02/2002<br>7.7                        | Current relevant Rx : Metformin. Add Gliclazide 80mg once daily, then 80mg twice daily, then 160mg twice daily       |
| Cholesterol<br>HDL-cholesterol<br>Triglyceride<br>LDL-cholesterol                                                                                                                                                                              | 07/02/2001<br>4.5<br>2.0 | 25/02/2002<br>5.7<br>1.31<br>3.4<br>2.85 | Current relevant Rx : Simvastatin. Increase statin to full dose and consider referral to a diabetes or lipid clinic. |
| S.creatinine                                                                                                                                                                                                                                   | 25/02/2002<br>80         | 05/05/2002<br>76                         |                                                                                                                      |
| U.albumin<br>U.alb/creat.ratio                                                                                                                                                                                                                 | 25/02/2002<br>3.4        | 26/03/2002<br>1.2                        |                                                                                                                      |
| Blood/Urine tests to be taken this review :                                                                                                                                                                                                    |                          |                                          |                                                                                                                      |
| HbA1c: <input checked="" type="checkbox"/> Lipids: <input checked="" type="checkbox"/> S.creatinine: <input checked="" type="checkbox"/> U.albumin/creat.ratio: <input checked="" type="checkbox"/> U.protein output: <input type="checkbox"/> |                          |                                          |                                                                                                                      |

| Assessment of Previous Clinical Examinations |                                        |                                        |                                                                                                                                                                                                                                                                                                                                                                                                                                           |
|----------------------------------------------|----------------------------------------|----------------------------------------|-------------------------------------------------------------------------------------------------------------------------------------------------------------------------------------------------------------------------------------------------------------------------------------------------------------------------------------------------------------------------------------------------------------------------------------------|
|                                              | Previous                               | Latest                                 | Management Prompt                                                                                                                                                                                                                                                                                                                                                                                                                         |
| BMI                                          | 02/08/2001<br>33.1                     | 01/11/2001<br>33.1                     | Discuss diet with patient or consider referral to dietitian.                                                                                                                                                                                                                                                                                                                                                                              |
| Systolic BP<br>Diastolic BP                  | 01/11/2001<br>150<br>80                | 06/02/2002<br>179<br>92                | If confirmed BP>140/80 mm Hg & normoalbuminuria, treat BP to reach target of 140/80. Consider ACE inhibitor &/or beta blocker as first 2 drugs of choice depending on pt's characteristics. Add other drugs, according to pts individual factors: thiazides, beta blockers, ACE Is & calcium channel blockers all effective in lowering BP. Monitor renal function at outset, within 1 wk of starting treatment & after each dose change. |
| Eye exam.<br>VA (Right)<br>VA (Left)         | 13/12/2000<br>ret.camera<br>6/4<br>6/5 | 25/02/2002<br>ret.camera<br>6/5<br>6/6 |                                                                                                                                                                                                                                                                                                                                                                                                                                           |
| Feet exam.                                   |                                        | 13/12/2000<br>clinician                | No foot exam recorded in last 14 months. Review all patients annually. Check pulses and sensation (monofilament to 10g level). For patients with no clinical evidence of neuropathy/PVD, provide general foot care education. Refer: "at risk feet" to Podiatry Clinic; absent pulses/signif.symptoms PVD to vascular surgeons; ulcers/infection URGENTLY to diabetologist or diabetic podiatrist; gangrene as EMERGENCY.                 |
| Diet assess.                                 | 02/02/2000<br>dietitian                | 06/02/2002<br>clinician                | Patient is obese. Discuss diet with patient or consider referral to dietitian.                                                                                                                                                                                                                                                                                                                                                            |
| Smoking status                               | 06/02/2002                             | 25/02/2002                             | Ask about smoking status. If patient smoking, consider referral to local smoking cessation guidelines.                                                                                                                                                                                                                                                                                                                                    |
| Chest pain                                   |                                        |                                        | Ask patient if they have had any chest pain or new breathlessness. If yes, refer to local CHD guidelines if available.                                                                                                                                                                                                                                                                                                                    |

| Actions Taken This Clinical Review                                                                                                                                                                 |               |           |                                                                 |          |                                                                                                                                                              |               |               |                 |                                                                       |               |                                                                                      |        |       |      |      |         |      |      |  |
|----------------------------------------------------------------------------------------------------------------------------------------------------------------------------------------------------|---------------|-----------|-----------------------------------------------------------------|----------|--------------------------------------------------------------------------------------------------------------------------------------------------------------|---------------|---------------|-----------------|-----------------------------------------------------------------------|---------------|--------------------------------------------------------------------------------------|--------|-------|------|------|---------|------|------|--|
| Date                                                                                                                                                                                               | Height metres | Weight Kg | BMI                                                             | BP mm Hg | Qual. prot.                                                                                                                                                  | Hyper epis/yr | Hypos. sev./m | No.with warning | Fundoscopy                                                            | Visual acuity | Diet                                                                                 | Feet   | DSN   | educ |      |         |      |      |  |
|                                                                                                                                                                                                    |               |           |                                                                 |          |                                                                                                                                                              |               |               |                 | Self                                                                  | Opt.          | Cam.                                                                                 | Ophth. | Right | Left | Disc | Dietit. | Exam | Pod. |  |
| SMOKING HISTORY                                                                                                                                                                                    |               |           | ALCOHOL (u/wk)                                                  |          | REFER TO:                                                                                                                                                    |               |               |                 | Date of vaccination                                                   |               | CARDIOLOGY                                                                           |        |       |      |      |         |      |      |  |
| <input checked="" type="checkbox"/> Never <input type="checkbox"/> Stopped in ( )                                                                                                                  |               |           | Never <input type="checkbox"/> Current <input type="checkbox"/> |          | <input type="checkbox"/> Ophth <input type="checkbox"/> Card. <input type="checkbox"/> Vasc.Sg. <input type="checkbox"/> Renal <input type="checkbox"/> Pod. |               |               |                 | Influenza <input type="checkbox"/> Pneumococ <input type="checkbox"/> |               | Has patient had chest pain? <input type="checkbox"/> Yes <input type="checkbox"/> No |        |       |      |      |         |      |      |  |
| Blood/Urine tests taken this review :                                                                                                                                                              |               |           |                                                                 |          |                                                                                                                                                              |               |               |                 |                                                                       |               |                                                                                      |        |       |      |      |         |      |      |  |
| HbA1c: <input type="checkbox"/> Lipids: <input type="checkbox"/> S.creatinine: <input type="checkbox"/> U.albumin/creat.ratio: <input type="checkbox"/> U.protein output: <input type="checkbox"/> |               |           |                                                                 |          |                                                                                                                                                              |               |               |                 |                                                                       |               |                                                                                      |        |       |      |      |         |      |      |  |

| Treatment Changes                                                                                                                                                                                                                                                        |
|--------------------------------------------------------------------------------------------------------------------------------------------------------------------------------------------------------------------------------------------------------------------------|
| The register currently has no medication data for this patient - please complete on the attached sheet. NB Consider aspirin. Aspirin (75mg/day) should be given routinely and continued for life in patients with diabetes and CHD (unless there are contraindications). |
